# Supplementary material
Source: Elsevier journal article supplement (https://www.sciencedirect.com/science/article/pii/S0048712021001018)
Supplement: mmc1 [file S0048712021001018:mmc1.pdf]

## EJERCICIO TERAPEUTICO.NIVEL BASICO

La actividad física regular y el ejercicio son importantes para acelerar la recuperación.

A continuación le damos unas recomendaciones y ejercicios fáciles de realizar en su habitación/ domicilio todos los días.

### **Recomendaciones generales**

- Realice cada uno de los ejercicios despacio y no todos seguidos, descansando entre ellos
- Recomendable 2-3 series con 5-10 repeticiones por ejercicio

### **No debe empezar a realizar ejercicio:**

- Inmediatamente después de las comidas (espere al menos 2 horas).
- Si tiene malestar (dolor de cabeza, mareos, náuseas, diarrea, vómitos, mucho cansancio...), fiebre, sensación de falta de aire

### **Debe finalizar el ejercicio**

- Si una vez iniciado el ejercicio, se empieza a encontrar mal (sudoración, mareo, dolor de cabeza, debilidad, falta de aire, dolor en el pecho...) pare inmediatamente la actividad

### **1. Cervicales**

Sentado con la espalda apoyada en el respaldo, gire el cuello muy despacio hacia un lado y después abajo y al otro lado como dibujando una U y manteniendo la posición 5 segundos.

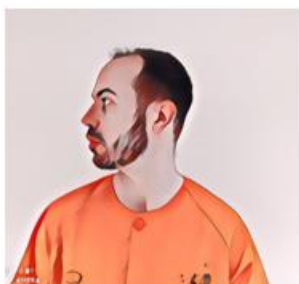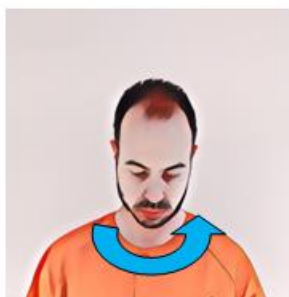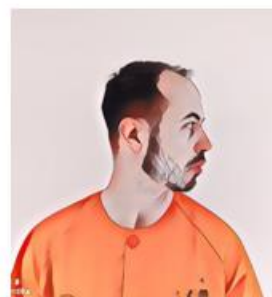

### **2. Hombros**

2.1 Sentado haga movimientos circulares con los hombros, llevándolos hacia delante y detrás. Intente realizar el ejercicio completo 10 veces

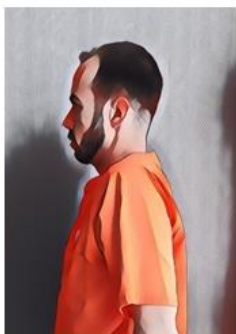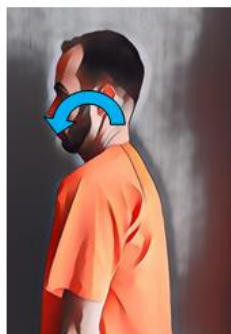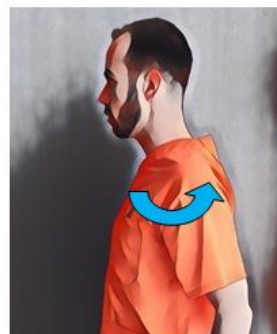

2.2 Suba los hombros despacio llevándolos hacia las orejas y luego bájelos todo lo que pueda como intentando alargar los brazos hacia abajo.

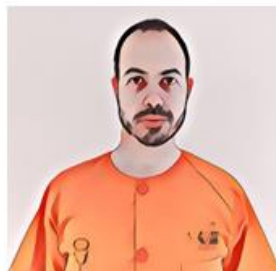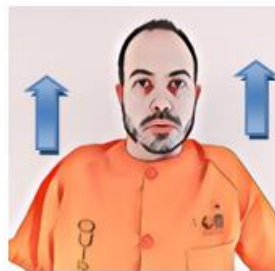

2.2 Coloque las manos juntas detrás de la cabeza, separe los codos, llevándolos hacia atrás notando el estiramiento en pecho. Vuelva después a la posición de inicio.

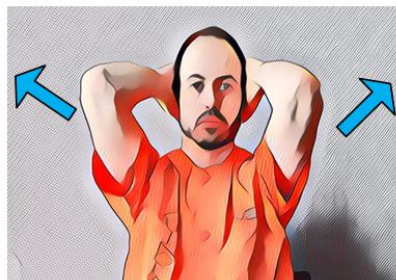

### 3. Brazos

3.1 Separe el brazo de forma lateral hasta ponerlo vertical, elevando la mano por encima de la cabeza.

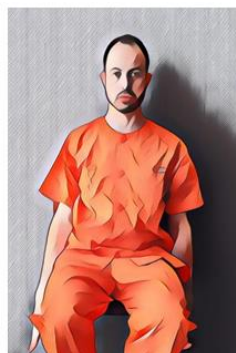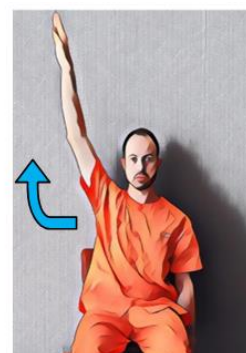

3.2 Sentado, realice la flexión y la extensión del codo, haciéndolo de forma alternante con ambos brazos.

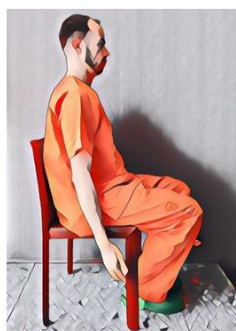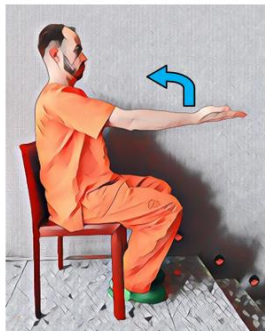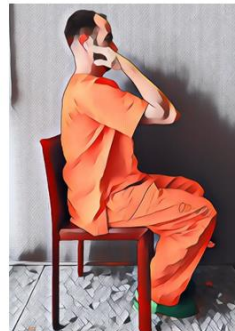

#### 4. Piernas

- 4.1 Levante la pelvis de la cama, manteniendo en línea tronco y pelvis. Mantenga la pelvis arriba durante 5 segundos y baje a posición inicial despacio.

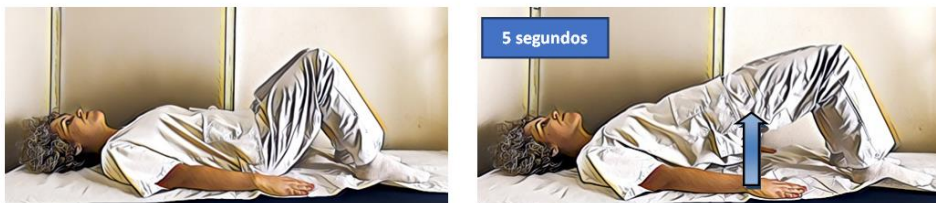

- 4.2 Levante la rodilla, acercándola al pecho, mantenga la rodilla cerca del pecho durante 5 segundos y baje rodilla lentamente

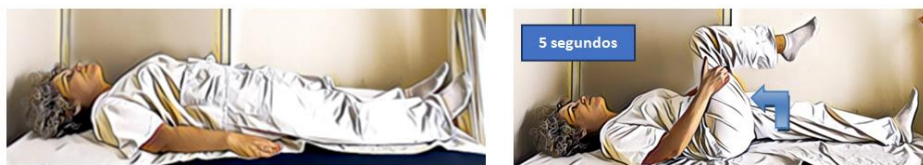

- 4.3 Realizar movimientos de flexo-extensión de tobillo (como pisando un pedal):

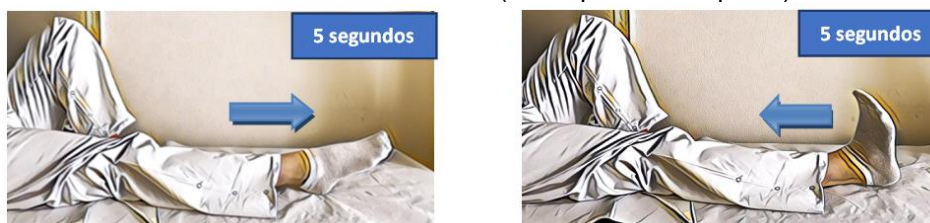

- 4.4 Sentado: extienda la rodilla. Mantenga la pierna estirada y vuelva a posición inicial.

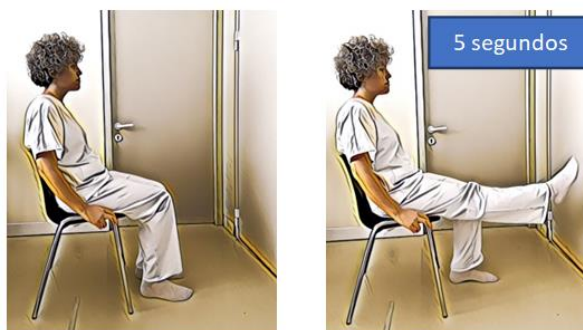

#### 5. EJERCICIOS DE PIE

Antes de empezar a hacer ejercicios de caminar, tiene que asegurarse de que es capaz de realizar estos descritos

##### 5.1 Ponerse de pie con apoyo

Levántese de la silla con ayuda de un respaldo de una silla o la barandilla de la cama o mueble. Intente aguantar de pie cada vez más tiempo.

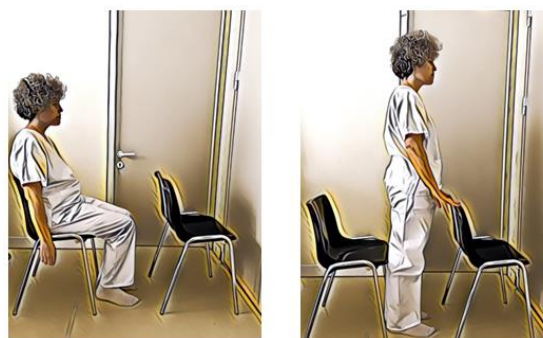



Una vez que sea capaz de aguantar de pie y se note seguro, pase a los siguientes ejercicios:

### 5.2 Puntillas

Agarrado al borde de una silla o mesa  
ponerse de puntillas con las dos piernas.  
Manténgase de puntillas 5 segundos.

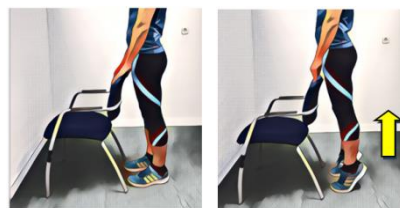

### 5.3 Rodillas arriba

De pie, apoyado en una silla o mesa,  
eleve la rodilla flexionada en dirección al  
pecho de forma alterna.

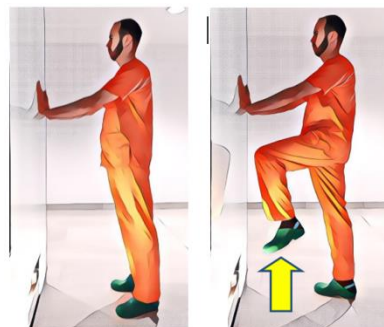

### 5.4 Talones arriba.

Agarrado al borde de una mesa o silla  
llevar los talones hacia la espalda, una  
pierna y luego otra, de forma alterna

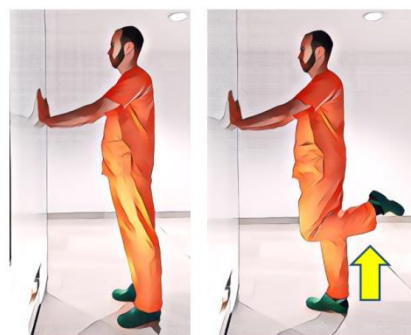

### 5.5 Separación cadera.

Separe lentamente una pierna sin doblar  
la rodilla y luego vuelva a la posición de  
inicio despacio, de forma alterna.

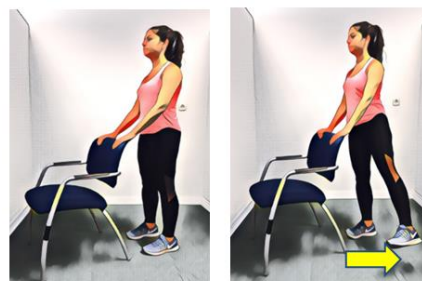

## 6 ESTIMULAR LA MARCHA

Dependiendo de la situación en que se encuentre y/o según indicación del personal sanitario, intente andar todo lo que pueda dentro de la habitación o domicilio siempre que no haya ningún problema.

Si no se siente seguro y estable a la hora de caminar, coméntelo con el equipo sanitario. Puede que necesite de una ayuda técnica (andador, bastones)

Estas recomendaciones no sustituyen, en ningún caso, las indicaciones del médico especialista
