# Supplementary material
Source: Elsevier journal article supplement (https://www.sciencedirect.com/science/article/pii/S0048712021001018)
Supplement: mmc2 [file S0048712021001018:mmc2.pdf]

## EJERCICIO TERAPÉUTICO. NIVEL INTERMEDIO - AVANZADO.

La actividad física regular y el ejercicio son importantes para acelerar la recuperación.

A continuación le damos unas recomendaciones generales y ejercicios fáciles de realizar en su habitación/ domicilio todos los días.

### RECOMENDACIONES GENERALES

- **No debe empezar a realizar ejercicio**
  - Inmediatamente después de las comidas (espere al menos 2 horas).
  - Si tiene malestar (dolor de cabeza, mareos, náuseas, diarrea, vómitos, mucho cansancio...), fiebre, sensación de falta de aire
- **Debe finalizar el ejercicio**
  - Si una vez iniciado el ejercicio, se empieza a encontrar mal (sudoración, mareo, dolor de cabeza, debilidad, falta de aire, dolor en el pecho...) pare inmediatamente la actividad

### ¡LEVÁNTESE Y CAMINE!

- Aunque se encuentre aislado en una habitación tiene que moverse. Pasar muchas horas sentado es perjudicial para la salud.
- Es por ello que le aconsejamos **levantarse cada 30 minutos** (salvo las horas de sueño) y de una vuelta alrededor de la habitación o camine en el sitio durante por lo menos 5 - 10 minutos.
- Si tiene acceso a un móvil, puede utilizar una aplicación para contabilizar los pasos.
- Si previamente a este ingreso, usted no caminaba mucho, o lleva mucho tiempo ingresado, no se desanime. **Intente superarse cada día.**

Además de caminar debe hacer ejercicio aeróbico y ejercicio de fuerza **¡Nunca se es demasiado mayor para empezar a hacer ejercicio!**

### EJERCICIO AERÓBICO

- Incluye actividades como marcha militar en el sitio, trotar en el sitio, bailar,...
- Tiene como objetivo mejorar nuestra tolerancia al esfuerzo.

### ¿Cuánto ejercicio aeróbico debe hacer?

- Si no está acostumbrado a hacer ejercicio o ha pasado mucho tiempo ingresado, empiece poco a poco. Puede empezar con 10 minutos/día y aumentar progresivamente cada día.
- En general, el objetivo es realizar ejercicio aeróbico 5 veces/ semana. 30 min/ día.

### ¿Cómo de intenso tiene que ser?

- Cuando esté realizando ejercicio aeróbico tiene que ser un ejercicio moderado, sentir que le implica algo de esfuerzo pero sin llegar a que le falte el aire.
- Si al realizar ejercicio aeróbico puede hablar con total normalidad, como cuando está sentado, eso implica que debe aumentar un poco la intensidad.

## **EJERCICIO DE FUERZA**

- Tiene como objetivo aumentar la masa muscular.

### ¿Cuánto y cómo de intenso tiene que ser?

- Realice los ejercicios del circuito (ver abajo) indicados por el profesional sanitario del Servicio de Medicina Física y Rehabilitación
- En general se recomienda realizarlos 3 días alternos/semana. Ej. Lunes, miércoles y viernes.
- Realice cada uno de los ejercicios despacio, descansando entre ellos (2-3 min).
- Si ha precisado un ingreso prolongado, nunca ha hecho ejercicio de fuerza o si en algún ejercicio siente que no puede llegar hasta las 10 repeticiones, puede inicialmente realizar 5 repeticiones y progresivamente aumentar según su tolerancia hasta 10 repeticiones.
- Según progrese, si es posible, intente realizar 2-3 series de 10 repeticiones de cada ejercicio.

#### **1. FLEXIÓN PARED**

De pie, codos estirados, manos separadas apoyadas en la pared, a la anchura de los hombros y a la altura del pecho con la espalda recta. Aproxímese a la pared lentamente flexionando los codos con la espalda recta. Vuelva a la posición de inicio lentamente estirando los codos.

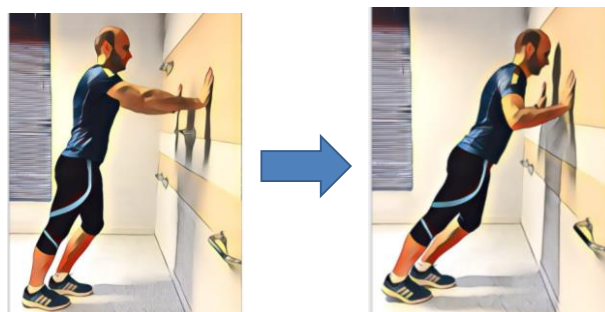

## 2. EXTENSIÓN DE CODOS

Sentado. Espalda recta y manos en contacto con los reposabrazos de la silla. Estire los codos de manera que despegue los glúteos de la silla, manteniendo la espalda recta y los codos próximos al tronco. Vuelva lentamente a la posición de inicio flexionando los codos.

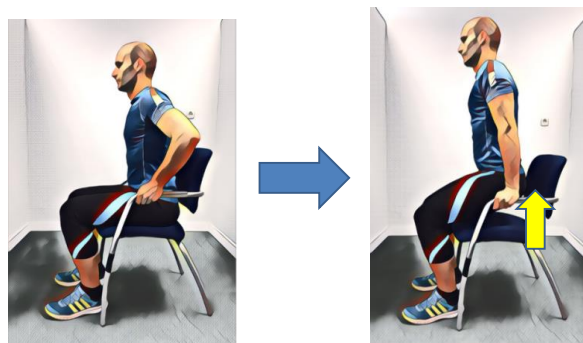

## 3. APROXIMACIÓN DE RODILLAS

Sentado en una silla, espalda recta, almohada o cojín situado entre las rodillas. Coloque los pies a la altura de los hombros y sitúe el cojín entre las rodillas. Sin mover los pies del suelo, cierre las rodillas de modo que apriete el cojín/almohada. Mantenga la contracción 2-3 segundos antes de volver a la posición de inicio.

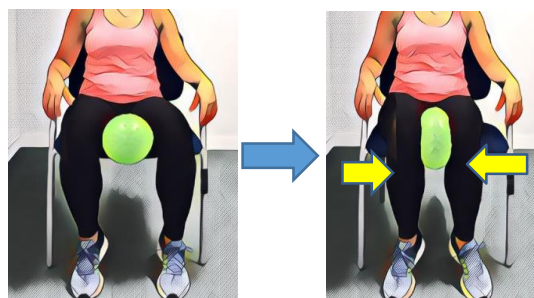

## 4. ELEVACIÓN DE TALONES

De pie junto a una silla con las manos apoyadas. Despegue los talones del suelo despacio y vuelva despacio a la posición de inicio. No flexione las rodillas y mantenga en todo momento la espalda recta.

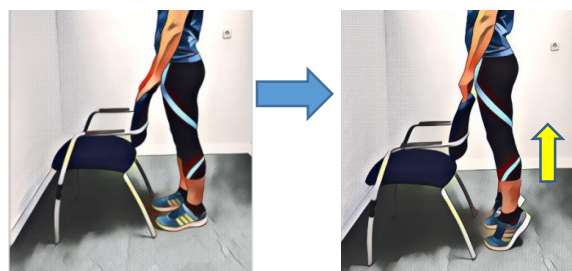

## 5. SENTADILLA

Sentado, manos en muslos, rodillas flexionadas, el asiento no debe ser muy bajo. Incline el tronco hacia delante y levántese, mirando al frente. Si tiene dificultad puede ayudarse de las manos para levantarse. Cuando vuelva a la posición de inicio, hágalo lentamente. No se deje caer bruscamente.

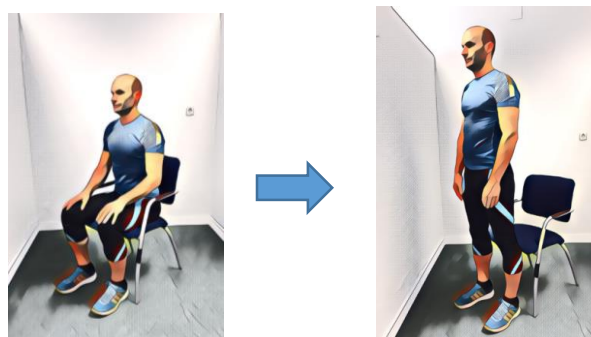

## 6. SEPARACIÓN DE PIERNA

De pie junto a una silla con las manos apoyadas. Separe lentamente una pierna sin doblar la rodilla y luego vuelva a la posición de inicio despacio. No incline el tronco. Haga 5 veces con una pierna y repita con la otra.

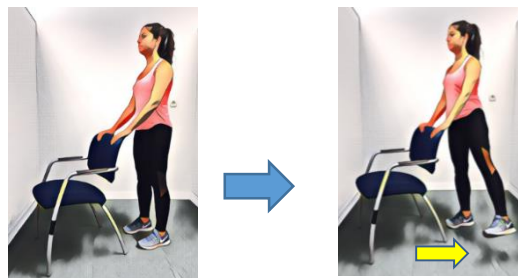

## 7. ELEVACIÓN DE RODILLA

Sentado con la espalda apoyada en el respaldo, rodilla flexionada 90°. Eleve la rodilla despacio en dirección al pecho y vuelva lentamente a la posición de inicio. Alterne ambas rodillas.

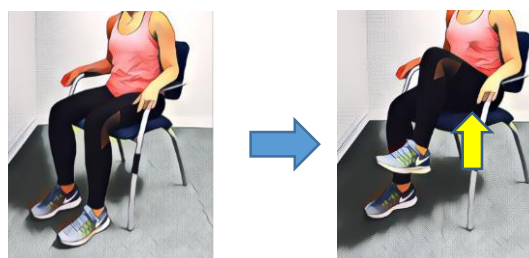

## 8. EXTENSIÓN DE RODILLA

Sentado, espalda apoyada en el respaldo, rodilla flexionada 90°. Extienda la rodilla lentamente hacia arriba, aguante 10 segundos y, vuelva despacio a la posición inicial. Alterne ambas piernas.

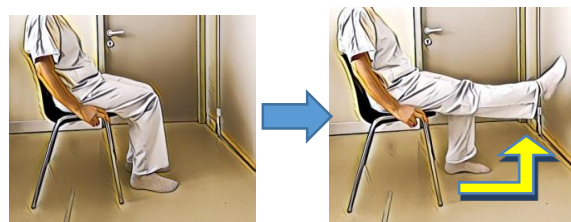

## 9. EL GATO

A 4 patas en el suelo con las manos a la altura de los hombros y las rodillas a la altura de las caderas. Al coger aire mire ligeramente hacia arriba arqueando suavemente la espalda hacia abajo, al expulsar el aire meta el ombligo hacia dentro y eleve la columna.

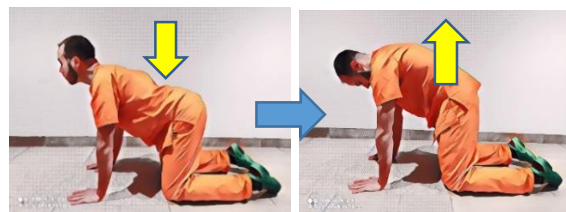

## 10. CUADRUPEDIA

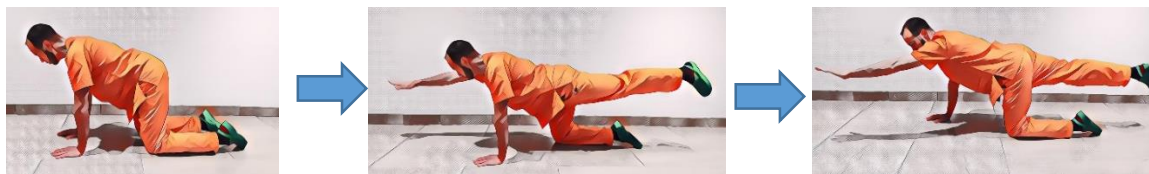

A 4 patas en el suelo con las manos a la altura de los hombros y las rodillas a la altura de las caderas. Levante un brazo y la pierna contraria a la vez mientras mantiene estable la espalda. Si no puede, puede hacer primero un brazo, luego una pierna. Después con el otro brazo y la otra pierna.

**Estas recomendaciones no sustituyen, en ningún caso, las indicaciones del médico especialista.**

**No dude en consultar al Servicio de Medicina Física y Rehabilitación si tiene alguna duda.**

Fecha inicio difusión: Abril 2020 Próxima actualización: Abril 2025

Documento aprobado por la Comisión técnica de coordinación de la información del HGUGM el 07/04/2020
