# Supplementary material
Source: Elsevier journal article supplement (https://www.sciencedirect.com/science/article/pii/S0048712021001018)
Supplement: mmc4 [file S0048712021001018:mmc4.doc]

**ENCUESTA DE SATISFACCIÓN DE LOS PACIENTES COVID-19**

Las siguientes preguntas están referidas a la atención recibida durante la estancia en el hotel, con motivo de su recuperación de infección por Covid-19 .

Su información es muy valiosa y nos permite mejorar continuamente la calidad de nuestra asistencia. De antemano le agradecemos su tiempo y disposición para contestarla.

Esta encuesta es anónima y su contestación es de carácter voluntario. Los datos que le solicitamos se tratarán informáticamente para realizar análisis estadísticos que permitan identificar áreas de mejora.

**Indique su nombre y apellidos**

______________

**Indique su fecha de nacimiento**

- Mes, día, año

**CUESTIONARIO DE SATISFACCIÓN: DATOS DEL PACIENTE**

**1. Indique el grupo de edad al que pertenece**

- De 18 a 34 años
- De 35 a 54 años
- De 55 a 74 años
- 75 años o más

**2. Indique su sexo**

- Hombre
- Mujer

**3. Indique su domicilio habitual**

- Privado, vive solo
- Privado, vive acompañado
- Residencia

**DURANTE SU ESTANCIA EN EL HOSPITAL**

**4. ¿Durante su ingreso en el hospital le proporcionaron una tabla de ejercicios?**

- Sí
- No
- No sabe

**5. Respecto a la tabla de ejercicios que le dieron en el hospital ¿Le explicaron cómo realizarlos?**

- Sí
- No
- No sabe

**A SU LLEGADA AL HOTEL**

**6. ¿Le proporcionaron a usted información general sobre los acontecimientos (ubicación, normas, accesos...)?**

- Sí
- No
- No sabe

**7. ¿Cuál es su grado de satisfacción sobre los siguientes aspectos de su estancia en el hotel?**

Muy Insatisfecho Insatisfecho Indiferente Satisfecho Muy Satisfecho

- Información general
- Trato y acogida
- Tiempo de espera hasta que fue visto por el médico
- Tiempo de espera desde que le dijeron que venía al hotel, hasta que se ubicó en la habitación

**DURANTE SU ESTANCIA EN EL HOTEL**

**8. ¿Conocía el nombre de las/os FISIOTERAPEUTAS que le atendieron?**

- Sí, de todos
- Sí, de algunos
- Ninguno

**9. Respecto a las/os FISIOTERAPEUTAS que le atendieron, indique en qué medida está Ud. satisfecho con los siguientes aspectos:**

Muy Insatisfecho Insatisfecho Indiferente Satisfecho Muy Satisfecho

- Su trato y amabilidad
- El Tiempo y dedicación
- La información sobre las recomendaciones de actividad

**10. Teniendo en cuenta todos estos aspectos, su SATISFACCIÓN GLOBAL con el personal que le atendió durante su ingreso es:**

Muy Insatisfecho Insatisfecho Indiferente Satisfecho Muy Satisfecho

- Médico
- Enfermeras/os
- Auxiliares de enfermería
- Terapeutas

**11. ¿Podría decirme si ha tenido dolor / dificultad respiratoria / sensación de falta de aire / fiebre / debilidad durante su estancia en el hotel?**

- Sí
- No

**12. ¿Cuál es su grado de satisfacción con dicho tratamiento para estos síntomas?**

- Muy Insatisfecho
- Insatisfecho
- Indiferente
- Satisfecho
- Muy Satisfecho

**13. Durante la estancia en el hotel recibió un folleto con ejercicios?**

- Sí
- No

**14. ¿Podría decirme si ha entendido los ejercicios enseñados?**

- Sí
- No

Después de la sección 7

**15. En caso de haber recibido el folleto ¿Cuántos días ha podido practicar los ejercicios durante su ingreso?**

- Ningún día
- Unos pocos días
- La mayoría de los días
- Todos los días

**16. En caso de haber recibido el folleto ¿Cuál es su grado de satisfacción general con dichos ejercicios?**

- Muy insatisfecho
- Insatisfecho
- Indiferente
- Satisfecho
- Muy satisfecho

**17. En caso de haber recibido el folleto ¿Cree que los ejercicios han sido los adecuados a su situación y al entorno donde los ha realizado?**

- Muy insatisfecho
- Insatisfecho
- Indiferente
- Satisfecho
- Muy satisfecho

**18. En caso de haber recibido el folleto ¿Cuál ha sido el grado de dificultad en cuanto a los ejercicios?**

- Muy difíciles
- defíciles
- Indiferente
- Fáciles
- Muy fáciles

**PREPARACIÓN DE SU VUELTA A CASA**

**19. ¿Le avisaron con antelación que se iba de alta?**

- Antes
- Mismo día
- No se le avisó

**20. En el momento del alta, ¿le dieron un informe/ por escrito?**

- Sí
- No

**21. Al darle el alta, ¿le informaron acerca del tratamiento y los cuidados a seguir en casa?**

- Sí
- No

**22. Al darle el alta, ¿le informaron acerca de los ejercicios y actividad física a realizar en casa?**

- Sí
- No

**VALORACIÓN GLOBAL Y RECOMENDACIÓN**

**24. ¿En qué medida recomienda este servicio de hospitalización a sus amigos y familiares?**

- Nunca
- 1
- 2
- 3
- 4
- 5
- 6
- 7
- 8
- 9
- 10
- Siempre

**SUGERENCIAS DE MEJORA**

**25. En relación con los servicios que ha recibido durante su estancia en el hospital ¿Cuál sería el aspecto principal que Ud. mejoraría? (especificar con detalle)**

**26. En relación con los servicios que ha recibido durante su estancia en el hotel ¿Cuál sería el aspecto principal que Ud. mejoraría? (especificar con detalle)**
