# Supplementary material
Source: Elsevier journal article supplement (https://www.sciencedirect.com/science/article/pii/S0048712021001018)
Supplement: mmc5 [file S0048712021001018:mmc5.doc]

**Variables del estudio HOTEL COLON COVID-19**

Esta parte del cuestionario recoge datos de los pacientes para analizar estadísticamente.

Muchas gracias por su colaboración

**1. Datos sociodemográficos**

- Nombre y apellidos

**2. Indique la fecha de su nacimiento**

- Mes, día, año

**3. Cuál es su idioma nativo**

- Castellano (España)
- Español (Latino América)
- Otro idioma

**4. Indique su nivel máximo de estudios académicos superados hasta el momento actual**

- Educación primaria obligatoria
- Educación secundaria obligatoria
- Opción 3
- Bachilerato, curso de acceso a ciclo formativo de grado medio, ciclo formativo de grado medio, o formación profesional básica
- Certificado de profesionalidad
- Ciclo formativo de grado superior
- Grado Universitario
- Máster universitario y grados en farmacia/medicina/veterinaria
- Doctorado

**5. ¿Es usted un profesional del sector de la salud?**

- Sí
- No

**6. ¿Usted es capaz de comer, vestirse y ducharse sin recibir ayuda de nadie?**

- Sí
- No

**7. ¿Usted es capaz de cocinar, manejar su medicación, hacer la compra y mantener la limpieza de su domicilio sin recibir ayuda de nadie?**

- Sí
- No

**8. Indique el nivel de ejercicio físico aeróbico -CAMINAR- que realizó previamente al ingreso hospitalario en el último año.**

- Sedentario. No realicé ningún tipo de ejercicio físico
- Caminaba ocasionalmente
- Caminaba 1 hora al día todos los días
- Caminaba menos de 2 horas al día todos los días
- Caminaba más de 2 horas al día todos los días

**8. Indique el nivel de ejercicio físico aeróbico que realizó previamente al ingreso hospitalario en el último año.**

- Ningún día a la semana
- Uno o dos días a la semana
- Tres o cuatro días a la semana
- cinco o más días a la seana

**8. Indique el nivel de ejercicio físico de fuerza que realizó previamente al ingreso hospitalario en el último año.**

- Ningún día a la semana
- Uno o dos días a la semana
- Tres o cuatro días a la semana

**Sigue las pautas dadas por el terapeuta en el hotel en su domicilio?**

- Sí
- No
- Parcialmente

**¿Por qué motivo?**

- Falta de tiempo
- Falta de motivación
- Falta de recursos
- se le ha olvidado en que consistía los ejercicios
- Otros motivos

**8. Indique el nivel de ejercicio físico aeróbico CAMINANDO que realiza actualmente en su domicilio**

- Sedentario. No realicé ningún tipo de ejercicio físico
- Caminaba ocasionalmente
- Caminaba 1 hora al día todos los días
- Caminaba menos de 2 horas al día todos los días
- Caminaba más de 2 horas al día todos los días

**8. Indique el nivel de ejercicio físico aeróbico que realiza actualmente en su domicilio**

- Ningún día a la semana
- Uno o dos días a la semana
- Tres o cuatro días a la semana
- cinco o más días a la semana

**8. Indique el nivel de ejercicio físico de fuerza que realiza actualmente en su domicilio**

- Ningún día a la semana
- Uno o dos días a la semana
- Tres o cuatro días a la semana

**9. ¿Tiene algún antecedente de enfermedad cardiológica o del corazón?**

- Sí
- No

**10. ¿Tiene algún antecedente de enfermedad respiratoria o pulmonar?**

- Sí
- No

**11. ¿Tiene algún antecedente de enfermedad neurológica o del sistema nervioso?**

- Sí
- No

**12. ¿Tiene algún antecedente de déficit cognitivo o demencia?**

- Sí
- No

**12. ¿Tiene algún antecedente de enfermedad psiquátrica?**

- Sí
- No

**13. ¿Durante su ingreso hospitalario necesitó ingresar en la unidad de cuidados intensivos (UCI) o en la unidad de reaminación (REA) para continuar su tratamiento?**

- Sí
- No

**14. ¿Se encuentra usted físicamente igual que antes de enfermar?**

- 1 - Sí, mi nivel físico es igual al anterior a enfermar
- 2 - Mi nivel físico es ligeramente inferior al anterior a enfermar
- 3 - Mi nivel físico es bastante inferior inferior al anterior a enfermar
- 4 - Mi nivel físico es peor inferior al anterior a enfermar
- 5 - Mi nivel físico es mucho peor inferior al anterior a enfermar

**Cree que necesita una consulta médica en rehabilitación para recuperarse o solo necesita tiempo**

- Sí, creo que necesito una consulta médica
- No, solo necesito tiempo para recuperarme

**¿Por qué motivo cree que necesita una consulta médica a raiz de la infección por COvid-19?**

- Debilidad musuclar
- Fatiga, me canso antes
- Disnea, sensación de falta de aire
- Dolor no controlado
- Limitación de movilidad de alguna articulación
- Alteración de la deglución
- Alteración del habla
- Alteración de la sensibilidad de alguna zona corporal
- Alteración a nivel cognitivo
- Otro motivo
