# Supplementary material
Source: Elsevier journal article supplement (https://www.sciencedirect.com/science/article/pii/S0048712021001018)
Supplement: mmc6 [file S0048712021001018:mmc6.doc]

Coeficiente de correlación de Pearson entre edad del paciente y e tipo de ejercicio entregado, la actividad física previa y la posterior a la infección y la auto-percepción de capacidad funcional y solicitud de valoración por rehabilitación.

|  |  | **Coeficiente de Pearson** | **P** |
| --- | --- | --- | --- |
| **Edad del paciente** | **Entrega de ejercicios nivel básico** | **0.305** | ***0,002** |
| **Edad del paciente** | **Entrega de ejercicios nivel avanzado** | **-0,311** | ***0.002** |
| **Cantidad de ejercicio aeróbico semanal antes del ingreso** | **Cantidad de días de ejercicio aeróbico semanal después del ingreso** | **0.428** | ***<0.001** |
| **Cantidad de días de ejercicio aneróbico semanal antes del ingreso** | **Cantidad de días de ejercicio anaeróbico después del ingreso** | ***0.467** | ***<0.001** |
| **Percepción de mal nivel físico en el momento de la entrevista** | **Percepción de necesidad de valoración por médico rehabilitador** | **0.344** | ***0.001** |
